# Supplementary material for: Effects of 17β-Estradiol Pollution on Microbial Communities and Methane Emissions in Aerobic Water Bodies
Source: MDPI journal article supplement (doi:10.3390/toxics12050373), 2024-05-19
Supplement: s1 [file s1]

---

# **Effects of 17 $\beta$ -Estradiol Pollution on Microbial Communities and Methane Emissions in Aerobic Water Bodies**

Zihao Gao <sup>a, c</sup>, Yu Zheng <sup>a, c</sup>, Zhendong Li<sup>a, c</sup>, Aidong Ruan <sup>a, b, \*</sup>

<sup>a</sup> The National Key Laboratory of Water Disaster Prevention, Hohai University, Nanjing 210098, China.

<sup>b</sup> College of Geography and Remote Sensing, Hohai University, Nanjing 210098, China.

<sup>c</sup> College of Hydrology and Water Resources, Hohai University, Nanjing 210098, China.

\*Corresponding Author: Aidong Ruan

E-mail address: adruan@hhu.edu.cn

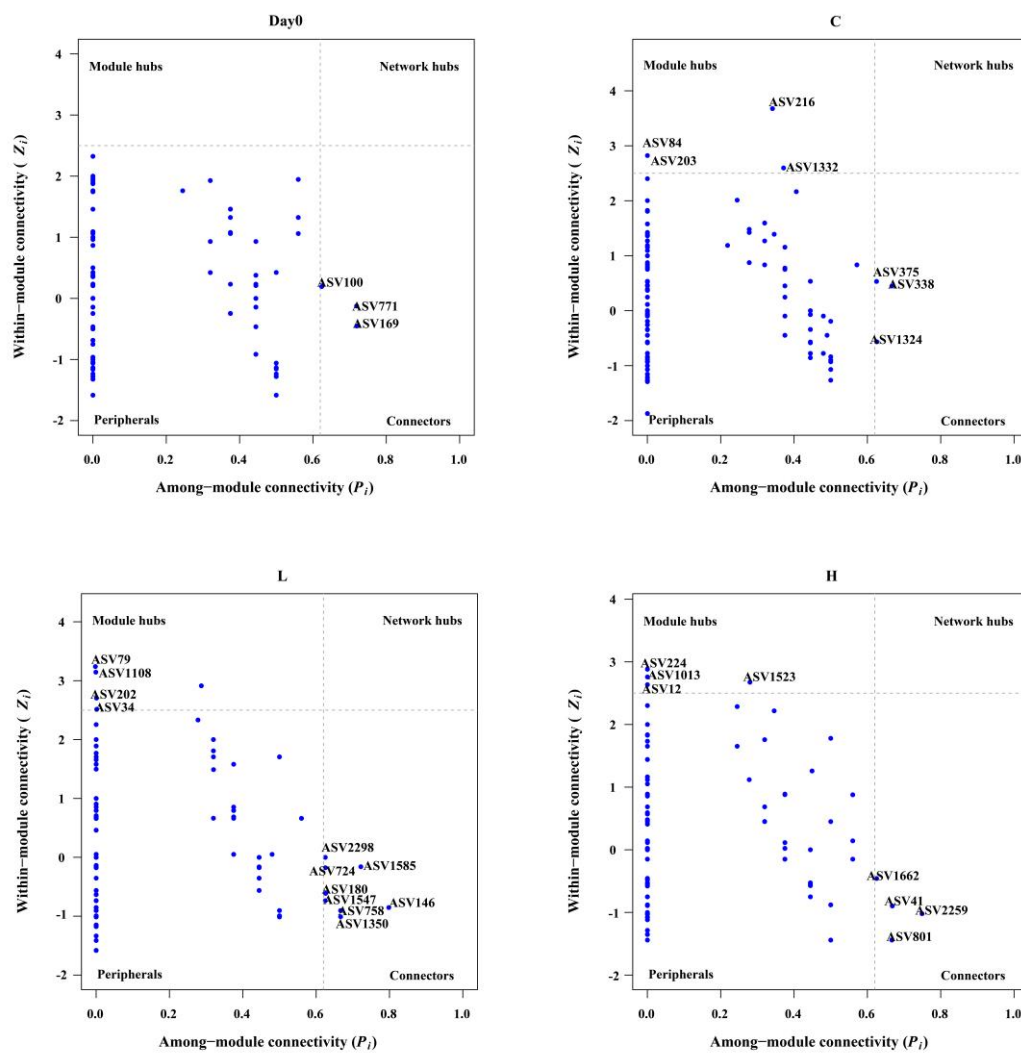

Figure S1 Zi-Pi plots for each network.

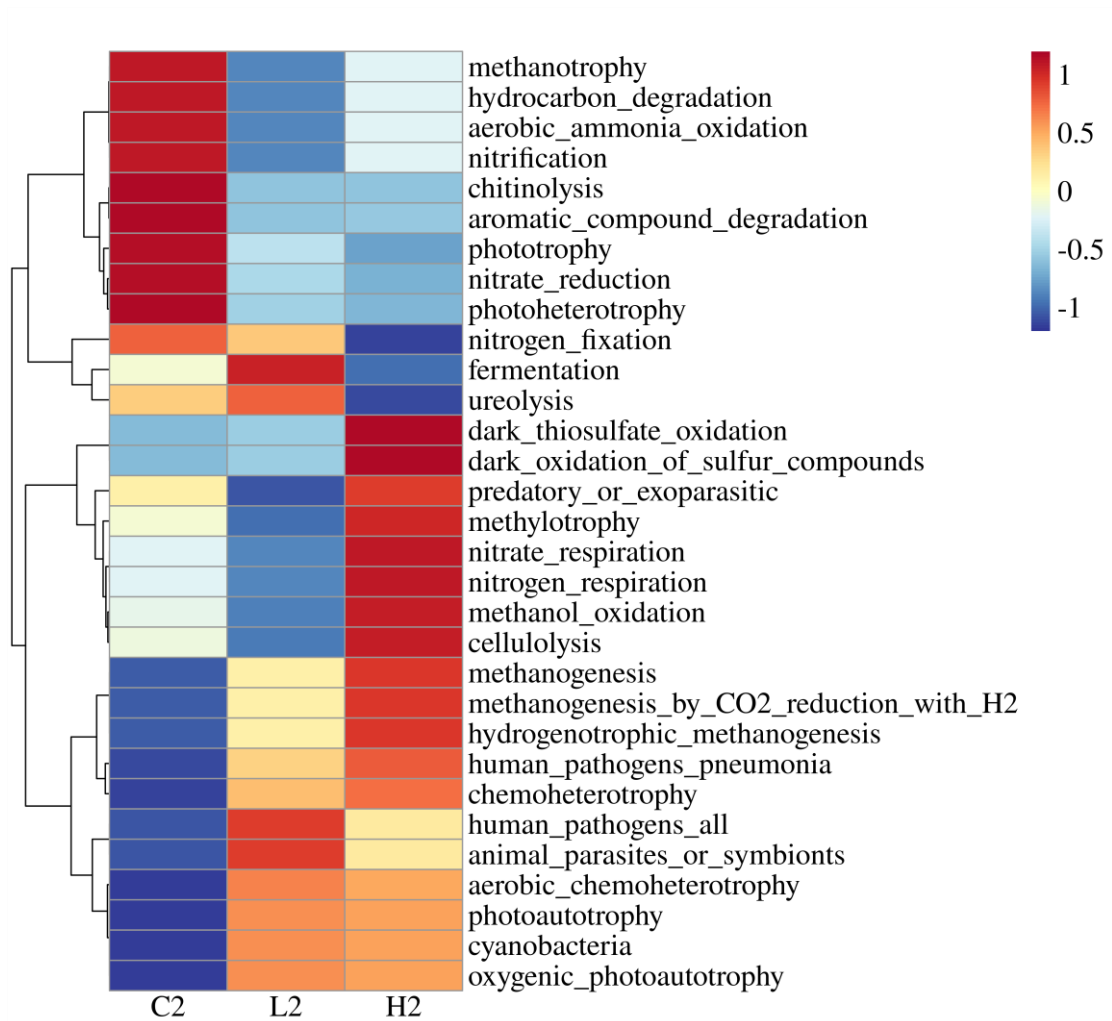

**Figure S2** Functional group abundance heatmap of bacterial and archaeal communities in different treatment groups on day 2.

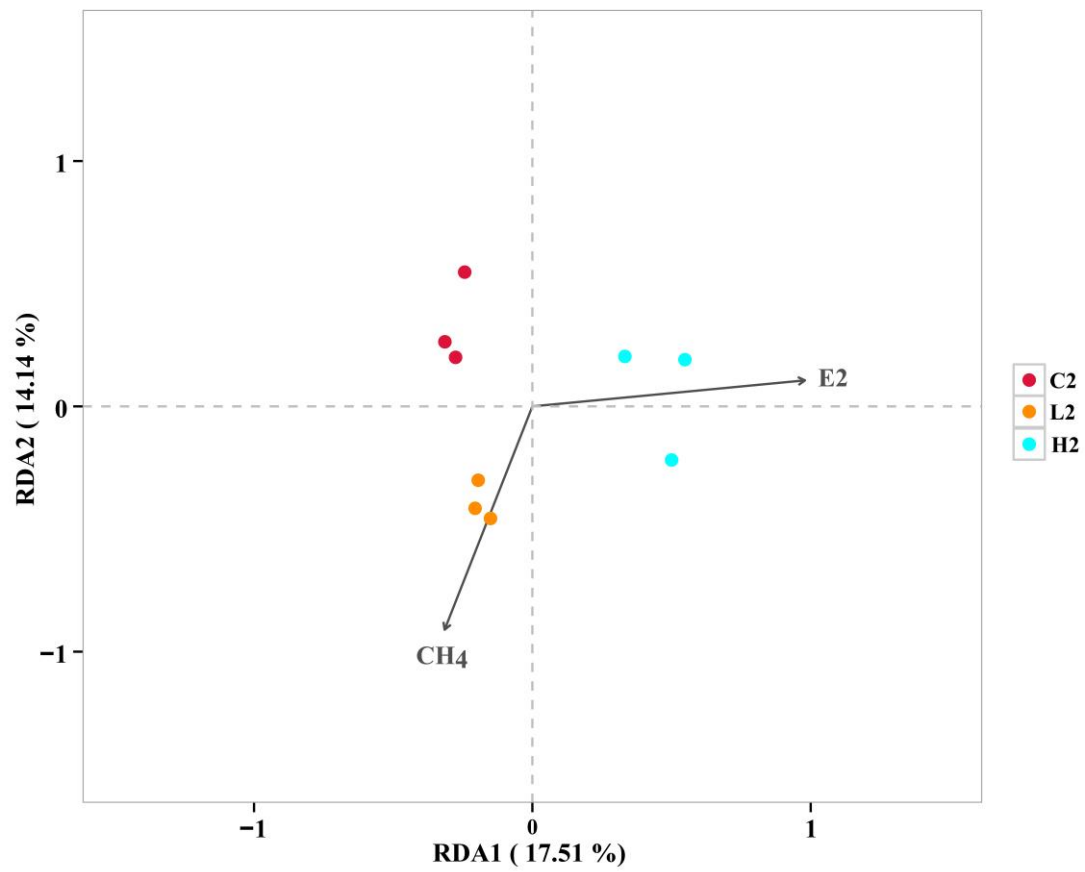

**Figure S3** Redundancy analysis (RDA) of the correlation between ASVs of bacterial and archaeal communities and properties on day 2.

**Table S1** Topological properties of empirical networks and random networks.

| Group | Empirical networks |             |             |                       |                       |                                        |                            |                                 |                             | Random networks                        |                            |                                 |                |
|-------|--------------------|-------------|-------------|-----------------------|-----------------------|----------------------------------------|----------------------------|---------------------------------|-----------------------------|----------------------------------------|----------------------------|---------------------------------|----------------|
|       | Cutoff             | Total nodes | Total links | R square of power-law | Average degree (avgK) | Average clustering coefficient (avgCC) | Average path distance (GD) | Harmonic geodesic distance (HD) | Modularity (module numbers) | Average clustering coefficient (avgCC) | Average path distance (GD) | Harmonic geodesic distance (HD) | Modularity (M) |
| Day0  | 0.92               | 165         | 190         | 0.94                  | 2.30                  | 0.06a                                  | 6.92b                      | 5.12                            | 0.774(25)c                  | 0.002 ± 0.005                          | 5.881 ± 0.245              | 4.797 ± 0.156                   | 0.724 ± 0.011  |
| C     | 0.92               | 222         | 324         | 0.91                  | 2.92                  | 0.16a                                  | 6.70b                      | 5.28                            | 0.781(23)c                  | 0.004 ± 0.004                          | 4.745 ± 0.094              | 4.121 ± 0.067                   | 0.618 ± 0.009  |
| L     | 0.92               | 225         | 266         | 0.89                  | 2.36                  | 0.10a                                  | 6.70b                      | 5.41                            | 0.802(31)c                  | 0.001 ± 0.003                          | 6.243 ± 0.218              | 5.199 ± 0.139                   | 0.726 ± 0.009  |
| H     | 0.92               | 209         | 267         | 0.95                  | 2.56                  | 0.14a                                  | 6.39b                      | 5.00                            | 0.804(29)c                  | 0.002 ± 0.003                          | 5.293 ± 0.151              | 4.498 ± 0.11                    | 0.678 ± 0.011  |

Note: a, b, and c represent significant differences in the average clustering coefficient (avgCC), average path length (GD), and modularity (M) between empirical networks and random networks, respectively.

**Table S2** Taxonomic classification of keystone ASVs.

| Groups | ID      | Network roles  | Phylum           | Class               | Family                 |
|--------|---------|----------------|------------------|---------------------|------------------------|
| Day0   | ASV100  | Connector hubs | Proteobacteria   | Gammaproteobacteria | Nitrosomonadaceae      |
|        | ASV169  | Connector hubs | Planctomycetota  | Planctomycetes      | Isosphaeraceae         |
|        | ASV771  | Connector hubs | Bdellovibrionota | Bdellovibrionia     | Bacteriovoraceae       |
| C      | ASV84   | Module hubs    | Proteobacteria   | Gammaproteobacteria | Xanthomonadaceae       |
|        | ASV203  | Module hubs    | Proteobacteria   | Gammaproteobacteria | Xanthomonadaceae       |
|        | ASV216  | Module hubs    | Acidobacteriota  | Thermoanaerobaculia | Thermoanaerobaculaceae |
|        | ASV338  | Connector hubs | Proteobacteria   | Gammaproteobacteria | Rhodocyclaceae         |
|        | ASV375  | Connector hubs | unclassified     | unclassified        | unclassified           |
|        | ASV1324 | Connector hubs | Myxococcota      | Polyangia           | Haliangiaceae          |
|        | ASV1332 | Module hubs    | Proteobacteria   | Alphaproteobacteria | Acetobacteraceae       |
|        | ASV34   | Module hubs    | Bacteroidota     | Bacteroidia         | Chitinophagaceae       |
|        | ASV79   | Module hubs    | Bdellovibrionota | Oligoflexia         | unclassified           |
| L      | ASV146  | Connector hubs | Actinobacteriota | Acidimicrobiia      | unclassified           |
|        | ASV180  | Connector hubs | unclassified     | unclassified        | unclassified           |
|        | ASV202  | Module hubs    | Planctomycetota  | Planctomycetes      | Isosphaeraceae         |
|        | ASV724  | Connector hubs | Proteobacteria   | Alphaproteobacteria | Sphingomonadaceae      |
|        | ASV758  | Connector hubs | Proteobacteria   | Alphaproteobacteria | Sphingomonadaceae      |
|        | ASV1108 | Module hubs    | Chloroflexi      | Dehalococcoidia     | uncultured             |
|        | ASV1350 | Connector hubs | Acidobacteriota  | Acidobacteriae      | unclassified           |
|        | ASV1547 | Connector hubs | Planctomycetota  | Planctomycetes      | Gemmataceae            |
|        | ASV1585 | Connector hubs | Chloroflexi      | Ktedonobacteria     | JG30_KF_AS9            |
|        | ASV2298 | Connector hubs | Gemmatimonadota  | Gemmatimonadetes    | Gemmatimonadaceae      |
|        | ASV12   | Module hubs    | Bacteroidota     | Bacteroidia         | env.OPS_17             |
|        | ASV41   | Connector hubs | Gemmatimonadota  | Gemmatimonadetes    | Gemmatimonadaceae      |
|        | ASV224  | Module hubs    | Planctomycetota  | Planctomycetes      | Gemmataceae            |
|        | ASV801  | Connector hubs | Planctomycetota  | Planctomycetes      | Isosphaeraceae         |
| H      | ASV1013 | Module hubs    | Planctomycetota  | Planctomycetes      | Pirellulaceae          |
|        | ASV1523 | Module hubs    | Proteobacteria   | Gammaproteobacteria | B1_7BS                 |
|        | ASV1662 | Connector hubs | Crenarchaeota    | Nitrososphaeria     | Nitrososphaeraceae     |
|        | ASV2259 | Connector hubs | Planctomycetota  | Planctomycetes      | Isosphaeraceae         |
|        |         |                |                  |                     |                        |

---

**Table S3** Results of Monte Carlo permutation test.

| <b>Properties</b> | <b>RDA1</b> | <b>RDA2</b> | <b>R<sup>2</sup></b> | <b>P-value</b> |
|-------------------|-------------|-------------|----------------------|----------------|
| E2                | 0.992       | 0.124       | 0.914                | <b>0.010</b>   |
| CH <sub>4</sub>   | -0.323      | -0.946      | 0.912                | <b>0.003</b>   |
